# Supplementary material for: Rivaroxaban, a direct inhibitor of coagulation factor Xa, attenuates adverse cardiac remodeling in rats by regulating the PAR-2 and TGF-β1 signaling pathways
Source: PeerJ. 2023 Sep 27;11:e16097. doi: 10.7717/peerj.16097 (PMC10541813; doi:10.7717/peerj.16097)
Supplement: Supplemental Information 1 [file peerj-11-16097-s001.xlsx]

## Sheet: Figure1+Figure2
Figure1 D
Area percentage of myocardial damage(%)
	Area 1	Area 2	Area 3
Sham	5.874	7.655	5.967
Sham+RIV	5.374	6.952	6.917
Sham+FSLLRY	5.974	7.611	5.462
LAD	45.982	45.475	49.709
LAD+RIV	27.158	21.261	23.398
LAD+FSLLRY	26.864	19.738	24.342
Figure2 B
	LVESP(mmHg)	﹢dp/dt(mmHg/s)	dp/dt(mmHg/s)
Sham	94.263	4530.22	-4581.69
Sham	87.752	4537	-4531.58
Sham	87.886	4463.86	-4486.89
Sham+RIV	87.752	4528.86	-4681.91
Sham+RIV	87.866	4463.86	-4620.96
Sham+RIV	87.557	4436.77	-4622.32
Sham+FSLLRY	87.594	4496.37	-4630.44
Sham+FSLLRY	85.558	4557.31	-4687.33
Sham+FSLLRY	87.582	4451.67	-4554.6
LAD	77.024	3077.06	-2634.19
LAD	77.121	3060.8	-2682.95
LAD	70.446	2588.1	-2490.59
LAD+RIV	87.8	4352.83	-4080.6
LAD+RIV	89.158	3870.62	-3472.45
LAD+RIV	89.097	3924.79	-3555.06
LAD+FSLLRY	84.084	4115.79	-4634.5
LAD+FSLLRY	84.267	4159.13	-4496.36
LAD+FSLLRY	80.44	4103.06	-4434.06
Figure2 D
Group	LVEF（%）	LVFS（%）
Sham	79	42
Sham	87	51
Sham	83	46
Sham	84	47
Sham+RIV	82	45
Sham+RIV	82	45
Sham+RIV	89	53
Sham+RIV	85	48
Sham+FSLLRY	82	45
Sham+FSLLRY	82	46
Sham+FSLLRY	88	52
Sham+FSLLRY	87	51
LAD	39	16
LAD	52	23
LAD	40	17
LAD	47	20
LAD+RIV	61	29
LAD+RIV	63	30
LAD+RIV	65	31
LAD+RIV	61	29
LAD+FSLLRY	69	34
LAD+FSLLRY	61	28
LAD+FSLLRY	70	34
LAD+FSLLRY	58	27

## Sheet: Figure3C
gray value of α-SMA				gray value of CollagenI				gray value of CollagenIII
A				A				A
Group	gray value by image J			Group	gray value by image J			Group	gray value by image J
Sham	20817			Sham	10505			Sham	18848
Sham+RIV	27312			Sham+RIV	12624			Sham+RIV	19273
Sham+FSLLRY	32974			Sham+FSLLRY	10817			Sham+FSLLRY	21989
LAD	81173			LAD	28076			LAD	55302
LAD+RIV	35895			LAD+RIV	15680			LAD+RIV	41946
LAD+FSLLRY	42931			LAD+FSLLRY	19608			LAD+FSLLRY	36437
A+GAPDH				A+GAPDH				A+GAPDH
Group	gray value by image J			Group	gray value by image J			Group	gray value by image J
Sham	60371			Sham	42824			Sham	55269
Sham+RIV	57848			Sham+RIV	43938			Sham+RIV	55163
Sham+FSLLRY	70372			Sham+FSLLRY	38436			Sham+FSLLRY	62213
LAD	73035			LAD	52487			LAD	57174
LAD+RIV	71607			LAD+RIV	44203			LAD+RIV	67465
LAD+FSLLRY	73681			LAD+FSLLRY	46028			LAD+FSLLRY	53598
B				B				B
Group	gray value by image J			Group	gray value by image J			Group	gray value by image J
Sham	15528			Sham	22503			Sham	16220
Sham+RIV	15752			Sham+RIV	23682			Sham+RIV	16488
Sham+FSLLRY	18738			Sham+FSLLRY	23917			Sham+FSLLRY	16827
LAD	42604			LAD	60594			LAD	64506
LAD+RIV	27344			LAD+RIV	34666			LAD+RIV	22405
LAD+FSLLRY	30452			LAD+FSLLRY	22188			LAD+FSLLRY	26846
B+GAPDH				B+GAPDH				B+GAPDH
Group	gray value by image J			Group	gray value by image J			Group	gray value by image J
Sham	38006			Sham	56360			Sham	31465
Sham+RIV	36100			Sham+RIV	54718			Sham+RIV	30322
Sham+FSLLRY	42810			Sham+FSLLRY	53367			Sham+FSLLRY	31839
LAD	35918			LAD	52582			LAD	43811
LAD+RIV	43834			LAD+RIV	50787			LAD+RIV	24057
LAD+FSLLRY	42768			LAD+FSLLRY	44231			LAD+FSLLRY	24180
C				C				C
Group	gray value by image J			Group	gray value by image J			Group	gray value by image J
Sham	8359			Sham	6124			Sham	13174
Sham+RIV	10332			Sham+RIV	6925			Sham+RIV	12630
Sham+FSLLRY	15021			Sham+FSLLRY	7866			Sham+FSLLRY	12781
LAD	36820			LAD	25570			LAD	35986
LAD+RIV	23819			LAD+RIV	9240			LAD+RIV	24969
LAD+FSLLRY	23744			LAD+FSLLRY	11978			LAD+FSLLRY	24269
C+GAPDH				C+GAPDH				C+GAPDH
Group	gray value by image J			Group	gray value by image J			Group	gray value by image J
Sham	25760			Sham	36023			Sham	49536
Sham+RIV	30562			Sham+RIV	43580			Sham+RIV	42710
Sham+FSLLRY	43380			Sham+FSLLRY	47555			Sham+FSLLRY	48864
LAD	34502			LAD	59028			LAD	45412
LAD+RIV	42222			LAD+RIV	41757			LAD+RIV	43939
LAD+FSLLRY	48179			LAD+FSLLRY	48534			LAD+FSLLRY	46458

## Sheet: Figure4
Figure4B				Figure4C					Figure4C				Figure4D
A		OD 450mm absorbance		A		OD 450mm absorbance			OD 450mm absorbance			A	No drug	0.196
	No drug	0.196			No drug	0.265			No drug	0.196			No drug	0.21
	No drug	0.206			No drug	0.263			No drug	0.21			No drug	0.213
	No drug	0.203			No drug	0.263			No drug	0.213			No cell	0.91
	No cell	1.037			No cell	1.683			No cell	0.91			No cell	0.876
	No cell	1.089			No cell	1.431			No cell	0.876			No cell	0.841
	No cell	1.139			No cell	1.517			No cell	0.841			5 ummol/L	0.847
	0.1ug/ml RIV	0.869			1uM AngII	2.303			0.1ug/ml RIV	0.892			5 ummol/L	0.888
	0.1ug/ml RIV	0.878			1uM AngII	2.397			0.1ug/ml RIV	0.833			5 ummol/L	0.854
	0.1ug/ml RIV	0.915			1uM AngII	2.372			0.1ug/ml RIV	0.856			10 ummol/L	0.839
	0.5ug/ml RIV	0.847			1uM AngII+0.1ug/ml RIV	2.179			0.5ug/ml RIV	0.807			10 ummol/L	0.818
	0.5ug/ml RIV	0.988			1uM AngII+0.1ug/ml RIV	2.213			0.5ug/ml RIV	0.856			10 ummol/L	0.848
	0.5ug/ml RIV	0.854			1uM AngII+0.1ug/ml RIV	2.175			0.5ug/ml RIV	0.802			20ug/ml RIV	0.831
	2ug/ml RIV	0.831			1uM AngII+0.5ug/ml RIV	2.15			2ug/ml RIV	0.752			20ug/ml RIV	0.781
	2ug/ml RIV	0.883			1uM AngII+0.5ug/ml RIV	2.147			2ug/ml RIV	0.832			20ug/ml RIV	0.798
	2ug/ml RIV	0.831			1uM AngII+0.5ug/ml RIV	2.135			2ug/ml RIV	0.78			40ug/ml RIV	0.731
	5ug/ml RIV	0.778			1uM AngII+2ug/ml RIV	2.11			5ug/ml RIV	0.778			40ug/ml RIV	0.783
	5ug/ml RIV	0.76			1uM AngII+2ug/ml RIV	2.027			5ug/ml RIV	0.76			40ug/ml RIV	0.811
	5ug/ml RIV	0.745			1uM AngII+2ug/ml RIV	2.079			5ug/ml RIV	0.745
					1uM AngII+5ug/ml RIV	2.01								OD 450mm absorbance
B		OD 450mm absorbance			1uM AngII+5ug/ml RIV	2.045						B	No drug	0.222
	No drug	0.207			1uM AngII+5ug/ml RIV	2.035			No drug	0.222			No drug	0.24
	No drug	0.21							No drug	0.24			No drug	0.236
	No drug	0.213		B		OD 450mm absorbance			No drug	0.236			No cell	0.838
	No cell	1.063			No drug	0.233			No cell	0.838			No cell	0.797
	No cell	1.015			No drug	0.23			No cell	0.797			No cell	0.794
	No cell	1.086			No drug	0.227			No cell	0.794			5 ummol/L	0.793
	0.1ug/ml RIV	0.907			No cell	1.998			0.1ug/ml RIV	0.791			5 ummol/L	0.785
	0.1ug/ml RIV	0.956			No cell	1.744			0.1ug/ml RIV	0.804			5 ummol/L	0.806
	0.1ug/ml RIV	0.902			No cell	1.568			0.1ug/ml RIV	0.789			10 ummol/L	0.788
	0.5ug/ml RIV	0.852			1uM AngII	3.051			0.5ug/ml RIV	0.711			10 ummol/L	0.758
	0.5ug/ml RIV	0.832			1uM AngII	3.052			0.5ug/ml RIV	0.811			10 ummol/L	0.791
	0.5ug/ml RIV	0.938			1uM AngII	3.008			0.5ug/ml RIV	0.788			20ug/ml RIV	0.795
	2ug/ml RIV	0.892			1uM AngII+0.1ug/ml RIV	3.017			2ug/ml RIV	0.795			20ug/ml RIV	0.739
	2ug/ml RIV	0.933			1uM AngII+0.1ug/ml RIV	2.927			2ug/ml RIV	0.756			20ug/ml RIV	0.773
	2ug/ml RIV	0.896			1uM AngII+0.1ug/ml RIV	3.015			2ug/ml RIV	0.65			40ug/ml RIV	0.698
	5ug/ml RIV	0.71			1uM AngII+0.5ug/ml RIV	2.679			5ug/ml RIV	0.691			40ug/ml RIV	0.713
	5ug/ml RIV	0.616			1uM AngII+0.5ug/ml RIV	2.631			5ug/ml RIV	0.713			40ug/ml RIV	0.734
	5ug/ml RIV	0.641			1uM AngII+0.5ug/ml RIV	2.679			5ug/ml RIV	0.692
					1uM AngII+2ug/ml RIV	2.606								OD 450mm absorbance
C		OD 450mm absorbance			1uM AngII+2ug/ml RIV	2.548						C	No drug	0.211
	No drug	0.228			1uM AngII+2ug/ml RIV	2.329			No drug	0.211			No drug	0.21
	No drug	0.246			1uM AngII+5ug/ml RIV	2.354			No drug	0.21			No drug	0.215
	No drug	0.205			1uM AngII+5ug/ml RIV	2.216			No drug	0.215			No cell	0.814
	No cell	1.201			1uM AngII+5ug/ml RIV	2.367			No cell	0.814			No cell	0.797
	No cell	1.21							No cell	0.797			No cell	0.822
	No cell	1.224		C		OD 450mm absorbance			No cell	0.822			5 ummol/L	0.818
	0.1ug/ml RIV	0.99			No drug	0.25			0.1ug/ml RIV	0.816			5 ummol/L	0.791
	0.1ug/ml RIV	1.134			No drug	0.259			0.1ug/ml RIV	0.803			5 ummol/L	0.778
	0.1ug/ml RIV	1.192			No drug	0.26			0.1ug/ml RIV	0.789			10 ummol/L	0.804
	0.5ug/ml RIV	1.028			No cell	1.554			0.5ug/ml RIV	0.828			10 ummol/L	0.759
	0.5ug/ml RIV	1.016			No cell	1.55			0.5ug/ml RIV	0.777			10 ummol/L	0.783
	0.5ug/ml RIV	1.069			No cell	1.641			0.5ug/ml RIV	0.773			20ug/ml RIV	0.752
	2ug/ml RIV	0.973			1uM AngII	2.504			2ug/ml RIV	0.743			20ug/ml RIV	0.75
	2ug/ml RIV	0.869			1uM AngII	2.528			2ug/ml RIV	0.765			20ug/ml RIV	0.757
	2ug/ml RIV	0.938			1uM AngII	2.519			2ug/ml RIV	0.757			40ug/ml RIV	0.75
	5ug/ml RIV	0.575			1uM AngII+0.1ug/ml RIV	2.137			5ug/ml RIV	0.743			40ug/ml RIV	0.741
	5ug/ml RIV	0.787			1uM AngII+0.1ug/ml RIV	2.395			5ug/ml RIV	0.741			40ug/ml RIV	0.736
	5ug/ml RIV	0.964			1uM AngII+0.1ug/ml RIV	2.405			5ug/ml RIV	0.726
					1uM AngII+0.5ug/ml RIV	2.071
					1uM AngII+0.5ug/ml RIV	2.295
					1uM AngII+0.5ug/ml RIV	2.229
					1uM AngII+2ug/ml RIV	2.141
					1uM AngII+2ug/ml RIV	2.125
					1uM AngII+2ug/ml RIV	2.192
					1uM AngII+5ug/ml RIV	2.049
					1uM AngII+5ug/ml RIV	2.1
					1uM AngII+5ug/ml RIV	2.093

## Sheet: Figure5
Figure 5B					Figure 5D
Group	fluorescence intensity of α-SMA				Group	fluorescence intensity of Ki67
Control	9.33				Control	2.08
Control	8.199				Control	1.165
Control	10.403				Control	1.055
AngII	35.973				AngII	12.91
AngII	34.323				AngII	13.515
AngII	39.696				AngII	11.205
RIV+AngII	18.953				RIV+AngII	7.785
RIV+AngII	20.043				RIV+AngII	4.675
RIV+AngII	20.136				RIV+AngII	4.215
FSLLRY+AngII	17.989				FSLLRY+AngII	3.98
FSLLRY+AngII	20.996				FSLLRY+AngII	6.06
FSLLRY+AngII	22.354				FSLLRY+AngII	4.49
RIV+PAR2-AP+AngII	27.764				RIV+PAR2-AP+AngII	7.555
RIV+PAR2-AP+AngII	24.896				RIV+PAR2-AP+AngII	10.905
RIV+PAR2-AP+AngII	26.367				RIV+PAR2-AP+AngII	10.4

## Sheet: Figure6A
Figure6 A
A								A								A
Gene	Group	△CT		Gene	Group	△CT		Gene	Group	△CT		Gene	Group	△CT		Gene	Group	△CT		Gene	Group	△CT
Collagen I	Control	22.0093		GAPDH	Control	20.4109		Collagen III	Control	22.4501		GAPDH	Control	17.4023		α-SMA	Control	17.3289		GAPDH	Control	20.4109
Collagen I	Control	21.4715		GAPDH	Control	20.5661		Collagen III	Control	22.6509		GAPDH	Control	17.3514		α-SMA	Control	17.4542		GAPDH	Control	20.5661
Collagen I	Control	21.0743		GAPDH	Control	20.5915		Collagen III	Control	22.0819		GAPDH	Control	17.2549		α-SMA	Control	17.1235		GAPDH	Control	20.5915
Collagen I	AngII	26.7969		GAPDH	AngII	26.9209		Collagen III	AngII	20.2462		GAPDH	AngII	17.3509		α-SMA	AngII	22.7097		GAPDH	AngII	26.9209
Collagen I	AngII	26.7695		GAPDH	AngII	27.2491		Collagen III	AngII	21.8546		GAPDH	AngII	17.2063		α-SMA	AngII	22.4923		GAPDH	AngII	27.2491
Collagen I	AngII	26.4399		GAPDH	AngII	27.4717		Collagen III	AngII	21.3927		GAPDH	AngII	17.1346		α-SMA	AngII	22.5515		GAPDH	AngII	27.4717
Collagen I	RIV+AngII	22.0715		GAPDH	RIV+AngII	21.6987		Collagen III	RIV+AngII	22.0261		GAPDH	RIV+AngII	17.2359		α-SMA	RIV+AngII	18.004		GAPDH	RIV+AngII	21.6987
Collagen I	RIV+AngII	22.3951		GAPDH	RIV+AngII	21.2271		Collagen III	RIV+AngII	22.8421		GAPDH	RIV+AngII	17.0657		α-SMA	RIV+AngII	17.7852		GAPDH	RIV+AngII	21.2271
Collagen I	RIV+AngII	22.046		GAPDH	RIV+AngII	21.562		Collagen III	RIV+AngII	21.3623		GAPDH	RIV+AngII	17.1701		α-SMA	RIV+AngII	17.7916		GAPDH	RIV+AngII	21.562
Collagen I	FSLLRY+AngII	20.595		GAPDH	FSLLRY+AngII	20.4471		Collagen III	FSLLRY+AngII	21.3459		GAPDH	FSLLRY+AngII	17.1503		α-SMA	FSLLRY+AngII	16.6389		GAPDH	FSLLRY+AngII	20.4471
Collagen I	FSLLRY+AngII	20.7501		GAPDH	FSLLRY+AngII	20.5488		Collagen III	FSLLRY+AngII	22.086		GAPDH	FSLLRY+AngII	17.132		α-SMA	FSLLRY+AngII	16.8519		GAPDH	FSLLRY+AngII	20.5488
Collagen I	FSLLRY+AngII	21.0059		GAPDH	FSLLRY+AngII	20.8555		Collagen III	FSLLRY+AngII	22.1384		GAPDH	FSLLRY+AngII	17.107		α-SMA	FSLLRY+AngII	17.1001		GAPDH	FSLLRY+AngII	20.8555
Collagen I	RIV+PAR2-AP-AngII	24.964		GAPDH	RIV+PAR2-AP-AngII	24.4209		Collagen III	RIV+PAR2-AP-AngII	21.4831		GAPDH	RIV+PAR2-AP-AngII	16.7142		α-SMA	RIV+PAR2-AP-AngII	20.3432		GAPDH	RIV+PAR2-AP-AngII	24.4209
Collagen I	RIV+PAR2-AP-AngII	24.015		GAPDH	RIV+PAR2-AP-AngII	24.4925		Collagen III	RIV+PAR2-AP-AngII	21.5697		GAPDH	RIV+PAR2-AP-AngII	16.9387		α-SMA	RIV+PAR2-AP-AngII	20.1982		GAPDH	RIV+PAR2-AP-AngII	24.4925
Collagen I	RIV+PAR2-AP-AngII	24.6828		GAPDH	RIV+PAR2-AP-AngII	24.977		Collagen III	RIV+PAR2-AP-AngII	21.33		GAPDH	RIV+PAR2-AP-AngII	16.8078		α-SMA	RIV+PAR2-AP-AngII	20.2324		GAPDH	RIV+PAR2-AP-AngII	24.977
B								B								B
Gene	Group	△CT		Gene	Group	△CT		Gene	Group	△CT		Gene	Group	△CT		Gene	Group	△CT		Gene	Group	△CT
Collagen I	Control	20.2593		GAPDH	Control	17.5614		Collagen III	Control	17.1672		GAPDH	Control	17.5614		α-SMA	Control	15.9412		GAPDH	Control	17.5614
Collagen I	Control	19.7465		GAPDH	Control	17.619		Collagen III	Control	16.8844		GAPDH	Control	17.619		α-SMA	Control	15.8652		GAPDH	Control	17.619
Collagen I	Control	19.5972		GAPDH	Control	17.7637		Collagen III	Control	17.3379		GAPDH	Control	17.7637		α-SMA	Control	16.1472		GAPDH	Control	17.7637
Collagen I	AngII	19.3403		GAPDH	AngII	18.3151		Collagen III	AngII	17.1029		GAPDH	AngII	18.3151		α-SMA	AngII	15.7286		GAPDH	AngII	18.3151
Collagen I	AngII	19.1824		GAPDH	AngII	18.2059		Collagen III	AngII	17.0863		GAPDH	AngII	18.2059		α-SMA	AngII	15.2551		GAPDH	AngII	18.2059
Collagen I	AngII	19.2169		GAPDH	AngII	18.3878		Collagen III	AngII	17.0994		GAPDH	AngII	18.3878		α-SMA	AngII	15.5504		GAPDH	AngII	18.3878
Collagen I	RIV+AngII	19.6776		GAPDH	RIV+AngII	17.3048		Collagen III	RIV+AngII	16.4319		GAPDH	RIV+AngII	17.3048		α-SMA	RIV+AngII	15.4001		GAPDH	RIV+AngII	17.3048
Collagen I	RIV+AngII	19.3372		GAPDH	RIV+AngII	17.5888		Collagen III	RIV+AngII	16.8545		GAPDH	RIV+AngII	17.5888		α-SMA	RIV+AngII	15.7243		GAPDH	RIV+AngII	17.5888
Collagen I	RIV+AngII	19.0437		GAPDH	RIV+AngII	17.4897		Collagen III	RIV+AngII	16.4697		GAPDH	RIV+AngII	17.4897		α-SMA	RIV+AngII	15.1349		GAPDH	RIV+AngII	17.4897
Collagen I	FSLLRY+AngII	19.1844		GAPDH	FSLLRY+AngII	17.6407		Collagen III	FSLLRY+AngII	17.0018		GAPDH	FSLLRY+AngII	17.6407		α-SMA	FSLLRY+AngII	15.4617		GAPDH	FSLLRY+AngII	17.6407
Collagen I	FSLLRY+AngII	19.8139		GAPDH	FSLLRY+AngII	17.691		Collagen III	FSLLRY+AngII	17.2561		GAPDH	FSLLRY+AngII	17.691		α-SMA	FSLLRY+AngII	15.5963		GAPDH	FSLLRY+AngII	17.691
Collagen I	FSLLRY+AngII	19.1497		GAPDH	FSLLRY+AngII	17.6996		Collagen III	FSLLRY+AngII	17.0924		GAPDH	FSLLRY+AngII	17.6996		α-SMA	FSLLRY+AngII	15.3407		GAPDH	FSLLRY+AngII	17.6996
Collagen I	RIV+PAR2-AP-AngII	19.6565		GAPDH	RIV+PAR2-AP-AngII	17.5491		Collagen III	RIV+PAR2-AP-AngII	17.2256		GAPDH	RIV+PAR2-AP-AngII	17.5491		α-SMA	RIV+PAR2-AP-AngII	15.8924		GAPDH	RIV+PAR2-AP-AngII	17.5491
Collagen I	RIV+PAR2-AP-AngII	19.9637		GAPDH	RIV+PAR2-AP-AngII	17.188		Collagen III	RIV+PAR2-AP-AngII	17.3243		GAPDH	RIV+PAR2-AP-AngII	17.188		α-SMA	RIV+PAR2-AP-AngII	15.9934		GAPDH	RIV+PAR2-AP-AngII	17.188
Collagen I	RIV+PAR2-AP-AngII	19.9355		GAPDH	RIV+PAR2-AP-AngII	17.3036		Collagen III	RIV+PAR2-AP-AngII	17.4207		GAPDH	RIV+PAR2-AP-AngII	17.3036		α-SMA	RIV+PAR2-AP-AngII	15.7928		GAPDH	RIV+PAR2-AP-AngII	17.3036
C								C								C
Gene	Group	△CT		Gene	Group	△CT		Gene	Group	△CT		Gene	Group	△CT		Gene	Group	△CT		Gene	Group	△CT
Collagen I	Control	19.3611		GAPDH	Control	18.8461		Collagen III	Control	19.5784		GAPDH	Control	18.8461		α-SMA	Control	16.0452		GAPDH	Control	17.4023
Collagen I	Control	20.1053		GAPDH	Control	19.0913		Collagen III	Control	19.2866		GAPDH	Control	19.0913		α-SMA	Control	16.1059		GAPDH	Control	17.3514
Collagen I	Control	19.6766		GAPDH	Control	18.6172		Collagen III	Control	18.9948		GAPDH	Control	18.6172		α-SMA	Control	15.9777		GAPDH	Control	17.2549
Collagen I	AngII	18.352		GAPDH	AngII	19.3098		Collagen III	AngII	18.1984		GAPDH	AngII	19.3098		α-SMA	AngII	15.0773		GAPDH	AngII	17.3509
Collagen I	AngII	19.1934		GAPDH	AngII	19.6347		Collagen III	AngII	18.1905		GAPDH	AngII	19.6347		α-SMA	AngII	14.0565		GAPDH	AngII	17.2063
Collagen I	AngII	19.2148		GAPDH	AngII	19.2101		Collagen III	AngII	18.9292		GAPDH	AngII	19.2101		α-SMA	AngII	14.7714		GAPDH	AngII	17.1346
Collagen I	RIV+AngII	21.1573		GAPDH	RIV+AngII	21.0016		Collagen III	RIV+AngII	20.8302		GAPDH	RIV+AngII	21.0016		α-SMA	RIV+AngII	15.315		GAPDH	RIV+AngII	17.2359
Collagen I	RIV+AngII	21.0048		GAPDH	RIV+AngII	20.3353		Collagen III	RIV+AngII	19.955		GAPDH	RIV+AngII	20.3353		α-SMA	RIV+AngII	15.9978		GAPDH	RIV+AngII	17.0657
Collagen I	RIV+AngII	20.3377		GAPDH	RIV+AngII	20.4401		Collagen III	RIV+AngII	20.3843		GAPDH	RIV+AngII	20.4401		α-SMA	RIV+AngII	15.3494		GAPDH	RIV+AngII	17.1701
Collagen I	FSLLRY+AngII	18.7761		GAPDH	FSLLRY+AngII	18.5589		Collagen III	FSLLRY+AngII	18.0117		GAPDH	FSLLRY+AngII	18.5589		α-SMA	FSLLRY+AngII	15.8099		GAPDH	FSLLRY+AngII	17.1503
Collagen I	FSLLRY+AngII	19.015		GAPDH	FSLLRY+AngII	18.2288		Collagen III	FSLLRY+AngII	19.3395		GAPDH	FSLLRY+AngII	18.2288		α-SMA	FSLLRY+AngII	15.2611		GAPDH	FSLLRY+AngII	17.132
Collagen I	FSLLRY+AngII	18.9585		GAPDH	FSLLRY+AngII	18.4318		Collagen III	FSLLRY+AngII	18.7913		GAPDH	FSLLRY+AngII	18.4318		α-SMA	FSLLRY+AngII	15.4252		GAPDH	FSLLRY+AngII	17.107
Collagen I	RIV+PAR2-AP-AngII	21.4756		GAPDH	RIV+PAR2-AP-AngII	21.1028		Collagen III	RIV+PAR2-AP-AngII	21.1689		GAPDH	RIV+PAR2-AP-AngII	21.1028		α-SMA	RIV+PAR2-AP-AngII	15.2288		GAPDH	RIV+PAR2-AP-AngII	16.7142
Collagen I	RIV+PAR2-AP-AngII	21.3714		GAPDH	RIV+PAR2-AP-AngII	21.2246		Collagen III	RIV+PAR2-AP-AngII	20.3892		GAPDH	RIV+PAR2-AP-AngII	21.2246		α-SMA	RIV+PAR2-AP-AngII	15.5178		GAPDH	RIV+PAR2-AP-AngII	16.9387
Collagen I	RIV+PAR2-AP-AngII	21.7853		GAPDH	RIV+PAR2-AP-AngII	21.0907		Collagen III	RIV+PAR2-AP-AngII	20.6651		GAPDH	RIV+PAR2-AP-AngII	21.0907		α-SMA	RIV+PAR2-AP-AngII	15.8153		GAPDH	RIV+PAR2-AP-AngII	16.8078

## Sheet: Figure6B
gray value of CollagenI				gray value of CollagenIII				gray value of α-SMA
A				A				A
Group	gray value by image J			Group	gray value by image J			Group	gray value by image J
Control	14348			Control	13455			Control	18132
AngII	38640			AngII	34805			AngII	42723
RIV+AngII	19989			RIV+AngII	16585			RIV+AngII	26426
FSLLRY+AngII	19424			FSLLRY+AngII	18085			FSLLRY+AngII	29383
RIV+PAR2-AP+AngII	24612			RIV+PAR2-AP+AngII	20902			RIV+PAR2-AP+AngII	33949
A+GAPDH				A+GAPDH				A+GAPDH
Group	gray value by image J			Group	gray value by image J			Group	gray value by image J
Control	17828			Control	75500			Control	80794
AngII	19323			AngII	78996			AngII	89848
RIV+AngII	19628			RIV+AngII	77502			RIV+AngII	81358
FSLLRY+AngII	16967			FSLLRY+AngII	74109			FSLLRY+AngII	87623
RIV+PAR2-AP+AngII	18321			RIV+PAR2-AP+AngII	71439			RIV+PAR2-AP+AngII	82595
B				B				B
Group	gray value by image J			Group	gray value by image J			Group	gray value by image J
Control	15704			Control	48500			Control	19111
AngII	33112			AngII	89309			AngII	35341
RIV+AngII	21943			RIV+AngII	42222			RIV+AngII	26487
FSLLRY+AngII	19393			FSLLRY+AngII	48370			FSLLRY+AngII	25498
RIV+PAR2-AP+AngII	23324			RIV+PAR2-AP+AngII	62597			RIV+PAR2-AP+AngII	32466
B+GAPDH				B+GAPDH				Group	gray value by image J
Group	gray value by image J			Group	gray value by image J			Control	56584
Control	41643			Control	72596			AngII	50948
AngII	41426			AngII	57132			RIV+AngII	50476
RIV+AngII	44566			RIV+AngII	55743			FSLLRY+AngII	60072
FSLLRY+AngII	46390			FSLLRY+AngII	58632			RIV+PAR2-AP+AngII	58083
RIV+PAR2-AP+AngII	48621			RIV+PAR2-AP+AngII	60907
								C
C				C				Group	gray value by image J
Group	gray value by image J			Group	gray value by image J			Control	30512
Control	11202			Control	25821			AngII	41649
AngII	24270			AngII	44793			RIV+AngII	24297
RIV+AngII	16142			RIV+AngII	31919			FSLLRY+AngII	26422
FSLLRY+AngII	13623			FSLLRY+AngII	31783			RIV+PAR2-AP+AngII	33078
RIV+PAR2-AP+AngII	18710			RIV+PAR2-AP+AngII	36526
								C+GAPDH
C+GAPDH				C+GAPDH				Group	gray value by image J
Group	gray value by image J			Group	gray value by image J			Control	30071
Control	32497			Control	95559			AngII	19902
AngII	32035			AngII	91535			RIV+AngII	17843
RIV+AngII	31148			RIV+AngII	98134			FSLLRY+AngII	18698
FSLLRY+AngII	29633			FSLLRY+AngII	95760			RIV+PAR2-AP+AngII	19432
RIV+PAR2-AP+AngII	29049			RIV+PAR2-AP+AngII	96017

## Sheet: Figure7B
gray value of PAR2				gray value of pSmad2/Smad2				gray value of pSmad3/Smad3				gray value of TGF-β
A				A				A				A
Group	gray value by image J			Group	gray value by image J			Group	gray value by image J			Group	gray value by image J
Sham	19725			Sham	14409			Sham	5851			Sham	41906
Sham+RIV	16113			Sham+RIV	15442			Sham+RIV	6685			Sham+RIV	39730
Sham+FSLLRY	18328			Sham+FSLLRY	19448			Sham+FSLLRY	6985			Sham+FSLLRY	44596
LAD	43316			LAD	40367			LAD	40702			LAD	64705
LAD+RIV	19811			LAD+RIV	23532			LAD+RIV	25036			LAD+RIV	58944
LAD+FSLLRY	23000			LAD+FSLLRY	25080			LAD+FSLLRY	26192			LAD+FSLLRY	51198
A+GAPDH				A+Smad2				A+Smad3				A+GAPDH
Group	gray value by image J			Group	gray value by image J			Group	gray value by image J			Group	gray value by image J
Sham	55736			Sham	26582			Sham	9679			Sham	38484
Sham+RIV	56813			Sham+RIV	30294			Sham+RIV	12249			Sham+RIV	35366
Sham+FSLLRY	61151			Sham+FSLLRY	37485			Sham+FSLLRY	12311			Sham+FSLLRY	37835
LAD	54767			LAD	37480			LAD	23339			LAD	37128
LAD+RIV	50031			LAD+RIV	33532			LAD+RIV	25061			LAD+RIV	43667
LAD+FSLLRY	48506			LAD+FSLLRY	34063			LAD+FSLLRY	25431			LAD+FSLLRY	41602
B				B				B				B
Group	gray value by image J			Group	gray value by image J			Group	gray value by image J			Group	gray value by image J
Sham	10895			Sham	25207			Sham	11485			Sham	25389
Sham+RIV	13085			Sham+RIV	22666			Sham+RIV	9463			Sham+RIV	33425
Sham+FSLLRY	12708			Sham+FSLLRY	24758			Sham+FSLLRY	11658			Sham+FSLLRY	26490
LAD	33973			LAD	49416			LAD	22996			LAD	53282
LAD+RIV	24300			LAD+RIV	26641			LAD+RIV	16107			LAD+RIV	32138
LAD+FSLLRY	26127			LAD+FSLLRY	24173			LAD+FSLLRY	18910			LAD+FSLLRY	38528
B+GAPDH				B+Smad2				B+Smad3				B+GAPDH
Group	gray value by image J			Group	gray value by image J			Group	gray value by image J			Group	gray value by image J
Sham	31023			Sham	33376			Sham	10422			Sham	39514
Sham+RIV	35319			Sham+RIV	29760			Sham+RIV	9783			Sham+RIV	42756
Sham+FSLLRY	40019			Sham+FSLLRY	31388			Sham+FSLLRY	9850			Sham+FSLLRY	37915
LAD	39819			LAD	32796			LAD	9428			LAD	36821
LAD+RIV	42941			LAD+RIV	29583			LAD+RIV	11443			LAD+RIV	36916
LAD+FSLLRY	46822			LAD+FSLLRY	28469			LAD+FSLLRY	12594			LAD+FSLLRY	45100
C				C				C				C
Group	gray value by image J			Group	gray value by image J			Group	gray value by image J			Group	gray value by image J
Sham	12881			Sham	21621			Sham	12204			Sham	22042
Sham+RIV	16333			Sham+RIV	24109			Sham+RIV	15847			Sham+RIV	27943
Sham+FSLLRY	18415			Sham+FSLLRY	25795			Sham+FSLLRY	21177			Sham+FSLLRY	27287
LAD	39683			LAD	65896			LAD	55488			LAD	48028
LAD+RIV	26998			LAD+RIV	34992			LAD+RIV	40302			LAD+RIV	34884
LAD+FSLLRY	22971			LAD+FSLLRY	41531			LAD+FSLLRY	40988			LAD+FSLLRY	35337
C+GAPDH				C+Smad2				C+Smad3				C+GAPDH
Group	gray value by image J			Group	gray value by image J			Group	gray value by image J			Group	gray value by image J
Sham	40354			Sham	25203			Sham	12723			Sham	46218
Sham+RIV	52272			Sham+RIV	25923			Sham+RIV	16654			Sham+RIV	55546
Sham+FSLLRY	54215			Sham+FSLLRY	25535			Sham+FSLLRY	19277			Sham+FSLLRY	55143
LAD	58351			LAD	25567			LAD	23557			LAD	60191
LAD+RIV	62406			LAD+RIV	26955			LAD+RIV	23500			LAD+RIV	64292
LAD+FSLLRY	64676			LAD+FSLLRY	32996			LAD+FSLLRY	25653			LAD+FSLLRY	70230

## Sheet: Figure8A
gray value of PAR2				gray value of pSmad2/Smad2				gray value of pSmad3/Smad3				gray value of TGF-β
A				A				A				A
Group	gray value by image J			Group	gray value by image J			Group	gray value by image J			Group	gray value by image J
Control	30079			Control	20932			Control	25478			Control	23826
AngII	47858			AngII	42710			AngII	67388			AngII	50785
RIV+AngII	29430			RIV+AngII	22881			RIV+AngII	40541			RIV+AngII	34664
FSLLRY+AngII	24410			FSLLRY+AngII	23141			FSLLRY+AngII	36660			FSLLRY+AngII	32589
RIV+PAR2-AP+AngII	38476			RIV+PAR2-AP+AngII	30042			RIV+PAR2-AP+AngII	61524			RIV+PAR2-AP+AngII	41724
A+GAPDH				A+Smad2				A+Smad3				A+GAPDH
Group	gray value by image J			Group	gray value by image J			Group	gray value by image J			Group	gray value by image J
Control	61456			Control	65763			Control	27748			Control	38464
AngII	40360			AngII	66235			AngII	28147			AngII	41584
RIV+AngII	46906			RIV+AngII	56035			RIV+AngII	29009			RIV+AngII	41427
FSLLRY+AngII	40099			FSLLRY+AngII	62768			FSLLRY+AngII	30342			FSLLRY+AngII	42972
RIV+PAR2-AP+AngII	43460			RIV+PAR2-AP+AngII	60369			RIV+PAR2-AP+AngII	32935			RIV+PAR2-AP+AngII	45544
B				B				B				B
Group	gray value by image J			Group	gray value by image J			Group	gray value by image J			Group	gray value by image J
Control	19788			Control	13043			Control	33156			Control	19154
AngII	43201			AngII	31464			AngII	63791			AngII	40938
RIV+AngII	25154			RIV+AngII	18440			RIV+AngII	35326			RIV+AngII	28333
FSLLRY+AngII	23481			FSLLRY+AngII	22659			FSLLRY+AngII	33822			FSLLRY+AngII	27162
RIV+PAR2-AP+AngII	40458			RIV+PAR2-AP+AngII	28523			RIV+PAR2-AP+AngII	53392			RIV+PAR2-AP+AngII	41738
B+GAPDH				B+Smad2				B+Smad3				B+GAPDH
Group	gray value by image J			Group	gray value by image J			Group	gray value by image J			Group	gray value by image J
Control	63674			Control	51281			Control	30344			Control	77832
AngII	49960			AngII	52054			AngII	25930			AngII	86172
RIV+AngII	66914			RIV+AngII	53292			RIV+AngII	23095			RIV+AngII	88266
FSLLRY+AngII	61341			FSLLRY+AngII	54300			FSLLRY+AngII	23123			FSLLRY+AngII	95205
RIV+PAR2-AP+AngII	57444			RIV+PAR2-AP+AngII	54131			RIV+PAR2-AP+AngII	27577			RIV+PAR2-AP+AngII	100886
C				C				C				C
Group	gray value by image J			Group	gray value by image J			Group	gray value by image J			Group	gray value by image J
Control	11884			Control	15997			Control	26384			Control	27414
AngII	33859			AngII	34936			AngII	59186			AngII	58158
RIV+AngII	21267			RIV+AngII	20464			RIV+AngII	35890			RIV+AngII	38622
FSLLRY+AngII	15045			FSLLRY+AngII	24635			FSLLRY+AngII	36391			FSLLRY+AngII	33555
RIV+PAR2-AP+AngII	25672			RIV+PAR2-AP+AngII	29374			RIV+PAR2-AP+AngII	42095			RIV+PAR2-AP+AngII	55624
C+GAPDH				C+Smad2				C+Smad3				C+GAPDH
Group	gray value by image J			Group	gray value by image J			Group	gray value by image J			Group	gray value by image J
Control	83894			Control	35206			Control	27451			Control	53945
AngII	86321			AngII	35417			AngII	25150			AngII	50262
RIV+AngII	89686			RIV+AngII	37234			RIV+AngII	31412			RIV+AngII	52222
FSLLRY+AngII	72603			FSLLRY+AngII	40948			FSLLRY+AngII	29387			FSLLRY+AngII	50595
RIV+PAR2-AP+AngII	76868			RIV+PAR2-AP+AngII	36857			RIV+PAR2-AP+AngII	25176			RIV+PAR2-AP+AngII	56265
